# Supplementary material
Source: publisher figshare collection journal article supplement (https://frontiersin.figshare.com/ndownloader/files/22145637)
Supplement: Supplementary file 1 [file 22145637]

## Sheet: at least one component is found
Species	PRC2			PRC1			Trithorax
Amphiprora paludosa, Strain CCMP125	Ez	-	-	-	-	-	Clade 1
Asterionellopsis glacialis	Ez	Suz12	-	-	-	Pc
Astrosyne radiata, Strain 13vi08-1A	Ez	Suz12	-	-	-	-
Attheya septentrionalis, Strain CCMP2084	Ez	Suz12	-	-	-	Pc	Clade 1
Aulacoseira subarctica , Strain CCAP 1002/5	Ez	-	-	-	-	Pc	Clade 1
Aureoumbra-lagunensis-CCMP1510	Ez	Suz12	Esc	-	-	-	Clade 3
Bathycoccus prasinos, Strain CCMP1898	Ez	Suz12	-	-	-	-
Bigelowiella natans, Strain CCMP1258.1	Ez	-	Esc	-	Psc	Pc	Clade 4
Bolidomonas pacifica, Strain CCMP 1866	Ez	-	-	-	-	Pc
Cafeteria sp., Strain Caron Lab Isolate	Ez	-	-	-	-	-
Chaetoceros debilis, Strain MM31A-1	Ez	Suz12	-	-	-	Pc
Chaetoceros dichaeta, Strain CCMP1751	Ez	-	-	-	-	-
Chaetoceros neogracile, Strain CCMP1317	Ez	Suz12	-	-	-	-
Chaetoceros-affinis-CCMP159	Ez	Suz12	-	-	-	-
Chlamydomonas chlamydogama, Strain SAG 11-48b	Ez	-	-	-	-	-
Chlamydomonas leiostraca, Strain SAG 11-49	Ez	-	Esc	RING	-	Pc
Chromulina nebulosa, Strain UTEXLB2642	Ez	-	-	-	-	Pc
Corethron hystrix, Strain 308	Ez	Suz12	-	-	-	-	Clade 1
Corethron pennatum, Strain L29A3	Ez	Suz12	-	-	Psc	Pc	Clade 1
Coscinodiscus wailesii, Strain CCMP2513	Ez	Suz12	-	-	-	Pc
Cyanoptyche gloeocystis , Strain SAG4.97	Ez	-	-	-	-	Pc
Cyclophora tenuis, Strain ECT3854	Ez	-	-	-	-	Pc
Cyclotella meneghiniana, Strain CCMP 338	Ez	Suz12	-	-	Psc	Pc	Clade 2
Dactyliosolen fragilissimus	Ez	suz12	-	-	-	Pc
Detonula confervacea, Strain CCMP 353	Ez	-	-	-	Psc	-	Clade 2
Dictyocha speculum, Strain CCMP1381	Ez	Suz12	-	-	Psc	Pc
Dinobryon-sp-UTEXLB2267	Ez	-	-	-	-	-
Ditylum-brightwellii-GSO103	Ez	-	-	-	-	-
Dolichomastix tenuilepis, Strain CCMP3274	Ez	Suz12	Esc	RING	-	-
Dunaliella-tertiolecta-CCMP1320	Ez	-	-	-	-	Pc
Elphidium margaritaceum	Ez	-	-	-	-	Pc
Emiliania-huxleyi-PLYM219	Ez	-	-	RING	Psc	Pc
Eucampia antarctica, Strain CCMP1452	Ez	-	-	-	-	-
Extubocellulus spinifer, Strain CCMP396	Ez	Suz12	-	-	-	Pc
Fabrea Fabrea salina	Ez	Suz12	-	-	-	-
Gephyrocapsa-oceanica-RCC1303	Ez	-	-	-	-	Pc	Clade 1
Goniomonas-pacifica-CCMP1869	Ez	Suz12	Esc	-	-	Pc
Grammatophora oceanica, Strain CCMP 410	Ez	-	-	-	-	-	Clade 1
Guillardia theta CCMP2712	Ez	-	-	RING	-	Pc
Gymnochlora sp., Strain CCMP2014	Ez	-	-	RING	-	-
Hanusia phi, Strain CCMP325	Ez	-	-	RING	-	Pc
Heterosigma akashiwo, Strain NB	Ez	-	-	-	-	-
Isochrysis-galbana-CCMP1323	Ez	-	-	RING	Psc	Pc
Leptocylindrus danicus var. danicus, Strain B650	Ez	-	-	-	-	-
Licmophora paradoxa, Strain CCMP2313	Ez	Suz12	-	-	-	Pc
Lotharella amoebiformis, Strain CCMP2058	Ez	Suz12	-	-	Psc	Pc	Clade 4
Lotharella globosa, Strain LEX01	Ez	Suz12	-	-	Psc	Pc
Lotharella oceanica, Strain CCMP622	Ez	Suz12	-	-	Psc	Pc
Mallomonas Sp, Strain CCMP3275	Ez	-	-	-	-	-
Micromonas pusilla, Strain CCMP1723	Ez	-	-	RING	-	-	Clade 4
Minutocellus polymorphus, Strain NH13	Ez	Suz12	-	-	-	-
Norrisiella sphaerica, Strain BC52	Ez	-	-	-	Psc	Pc
Ostreococcus mediterraneus, Strain clade-D-RCC2593	Ez	Suz12	-	-	-	-
Ostreococcus prasinos, Strain BCC99000	Ez	Suz12	-	-	-	-
Paraphysomonas bandaiensis, Strain Caron Lab Isolate	Ez	-	-	-	-	-	Clade 4
Paraphysomonas vestita, Strain GFlagA	Ez	-	-	-	-	Pc
Pelagococcus-subviridis-CCMP1429	Ez	-	-	-	-	-
Pelagomonas calceolata, Strain RCC969	Ez	-	Esc	-	-	-	Clade 1
Phaeomonas parva, Strain CCMP2877	Ez	-	-	-	-	-
Proboscia alata, Strain PI-D3	Ez	Suz12	-	-	-	-	Clade1
Proboscia inermis, Strain CCAP1064/1	Ez	Suz12	-	-	-	Pc
Proteomonas sulcata, Strain CCMP704	Ez	-	-	-	-	-
Protocruzia adherens, Strain Boccale	Ez	-	-	RING	-	Pc
Pteridomonas-danica-PT	Ez	-	-	-	-	-
Pycnococcus provasolii, Strain RCC931	Ez	-	-	-	-	-	Clade 4
Pyramimonas amylifera, Strain CCMP720	Ez	-	-	-	-	-	Clade 4
Pyramimonas-parkeae-CCMP726	Ez	Suz12	-	-	-	Pc
Rhizosolenia setigera, Strain CCMP 1694	Ez	-	-	-	-	Pc
Rhodella-maculata-CCMP736	Ez	-	-	-	-	Pc
Skeletonema costatum, Strain 1716	Ez	-	-	-	-	Pc	Clade 2
Skeletonema japonicum, Strain CCMP2506	Ez	-	-	-	-	Pc	Clade 2
Skeletonema-marinoi-SkelA	Ez	-	-	-	-	Pc	Clade 2
Skeletonema-menzelii-CCMP793	Ez	-	-	-	-	Pc	Clade 2
Sorites sp.	Ez	-	Esc	-	-	-
Staurosira complex sp., Strain CCMP2646	Ez	Suz12	-	-	-	-
Stichococcus sp, Strain RCC1054	Ez	Suz12	-	-	-	-
Synedropsis recta cf, Strain CCMP1620	Ez	suz12	-	-	-	-
Tetraselmis sp., Strain GSL018	Ez	Suz12	-	-	-	-
Thalassionema frauenfeldii, Strain CCMP 1798	Ez	Suz12	-	-	-	Pc
Thalassionema nitzschioides, Strain L26-B	Ez	Suz12	-	-	-	Pc	Clade 2
Thalassiosira antarctica, Strain CCMP982	Ez	Suz12	-	-	Psc	Pc	Clade 2
Thalassiosira gravida, Strain GMp14c1	Ez	Suz12	-	-	Psc	-
Thalassiosira miniscula, Strain CCMP1093	Ez	-	-	-	-	-	Clade 2
Thalassiosira punctigera, Strain Tpunct2005C2	Ez	-	-	-	-	-
Thalassiosira-oceanica-CCMP1005	Ez	-	-	-	-	-	Clade 2
Thalassiosira-rotula-CCMP3096	Ez	-	-	-	Psc	Pc
Thalassiosira-weissflogii-CCMP1336	Ez	Suz12	-	-	Psc	-
Alexandrium minutum	-	-	Esc	RING	-	-
Alexandrium tamarense, Strain CCMP1771	-	-	Esc	-	-	-
Alexandrium-temarense-CCMP1771	-	-	Esc	-	-	-
Aristerostoma sp., Strain ATCC 50986	-	-	Esc	-	-	-
Chroomonas mesostigmatica_cf, Strain CCMP1168	-	-	Esc	-	-	-
Coccolithus pelagicus ssp braarudi, Strain PLY182g	-	-	Esc	-	-	-
Crustomastix stigmata, Strain CCMP3273	-	-	Esc	-	-	Pc
Durinskia baltica, Strain CSIRO CS-38	-	-	Esc	-	-	-
Erythrolobus australicus, Strain CCMP3124	-	-	Esc	-	-	Pc
Erythrolobus madagascarensis, Strain CCMP3276	-	-	Esc	-	-	-
Eutreptiella gymnastica	-	-	Esc	-	-	Pc
Filamoeba nolandi, Strain NC-AS-23-1	-	-	Esc	-	-	Pc
Geminigera cryophila, Strain CCMP2564	-	-	Esc	-	-	-
Hemiselmis andersenii, Strain CCMP1180	-	-	Esc	RING	-	-
Hemiselmis rufescens, Strain PCC563	-	-	Esc	RING	-	Pc
Hemiselmis tepida, Strain CCMP443	-	-	Esc	RING	-	-
Hemiselmis virescens, Strain PCC157	-	-	Esc	-	-	Pc
Lotharella-globosa-CCCM811	-	-	Esc	-	-	-
Mantoniella antarctica, Strain SL-175	-	-	Esc	-	-	-	Clade 4
Myrionecta rubra, Strain CCMP2563	-	-	Esc	-	-	-
Nephroselmis pyriformis, Strain CCMP717	-	-	Esc	-	-	Pc
Paraphysomonas-imperforata-PA2	-	-	Esc	-	-	-
Platyophrya macrostoma, Strain WH	-	-	Esc	RING	-	Pc
Prasinoderma singularis, Strain RCC927	-	-	Esc	-	-	Pc	Clade 3
Rhodomonas-sp-CCMP768	-	-	Esc	-	-	-
Schizochytrium-aggregatum-ATCC28209	-	-	Esc	-	-	-
Scrippsiella-trochoidea-CCMP3099	-	-	Esc	-	-	-
Tetraselmis striata, Strain LANL1001	-	-	Esc	-	-	-
Tiarina fusus, Strain LIS	-	Suz12	Esc	-	-	Pc	Clade 2
Chlamydomonas euryale, Strain CCMP219	-	Suz12	-	-	-	-
Chrysoreinhardia sp, Strain CCMP2950	-	Suz12	-	-	-	-
Chrysoreinhardia sp, Strain CCMP3193	-	Suz12	-	-	-	-
Ditylum brightwellii, Strain Pop1 (SS4)	-	Suz12	-	-	Psc	Pc
Fragilariopsis kerguelensis, Strain L2-C3	-	Suz12	-	-	-	-
Odontella Sinensis, Strain Grunow 1884	-	Suz12	-	-	-	-
Palpitomonas bilix	-	Suz12	-	RING	-	Pc
Picocystis-salinarum-CCMP1897	-	Suz12	-	-	-	Pc	Clade 4
Pinguiococcus pyrenoidosus, Strain CCMP2078	-	Suz12	-	-	-	-
Prasinoderma coloniale, Strain CCMP1413	-	Suz12	-	-	-	Pc	Clade 4
Pseudo-nitzschia arenysensis, Strain B593	-	Suz12	-	RING	-	-
Pseudo-nitzschia delicatissima, Strain B596	-	Suz12	-	-	-	-	Clade 1
Pseudopedinella-elastica-CCMP716	-	Suz12	-	-	-	Pc
Pyramimonas obovata, Strain CCMP722	-	Suz12	-	-	-	Pc
Rhizochromulina marina cf, Strain CCMP1243	-	Suz12	-	-	-	-
Striatella unipunctata, Strain CCMP2910	-	Suz12	-	-	-	Pc
Tetraselmis astigmatica, Strain CCMP880	-	Suz12	-	-	-	-
Tetraselmis chuii, Strain PLY429	-	Suz12	-	-	-	-
Triceratium dubium, Strain CCMP147	-	Suz12	-	-	-	Pc
Alexandrium andersonii, Strain CCMP2222	-	-	-	RING	-	-
Alexandrium margalefi, Strain AMGDE01CS-322	-	-	-	RING	-	-
Aristerostoma sp., Strain ATCC 50986	-	-	-	RING	-	-
Bicosoecid sp, Strain ms1	-	-	-	RING	-	-
Chrysochromulina brevifilum, Strain UTEX LB 985	-	-	-	RING	Psc	Pc
Climacostomum Climacostomum virens, Strain Stock W-24	-	-	-	RING	-	Pc
Exanthemachrysis gayraliae, Strain RCC1523	-	-	-	RING	-	Pc
Florenciella parvula, Strain CCMP2471	-	-	-	RING	-	Pc
Gonyaulax spinifera, Strain CCMP409	-	-	-	RING	-	-
Karenia-brevis-SP1	-	-	-	RING	-	-
Kryptoperidinium-foliaceum-CCMP1326	-	-	-	RING	-	-
Neoparamoeba aestuarina, Strain SoJaBio B1-5/56/2	-	-	-	RING	Psc	Pc
Pavlova lutheri, Strain RCC1537	-	-	-	RING	-	Pc
Percolomonas cosmopolitus, Strain AE-1 (ATCC 50343)	-	-	-	RING	-	-
Scrippsiella hangoei-like, Strain SHHI-4	-	-	-	RING	-	-
Skeletonema grethea, Strain CCMP 1804	-	-	-	RING	-	Pc
Symbiodinium sp., Strain cladeA	-	-	-	RING	-	-
Vannella sp., Strain DIVA3 517/6/12	-	-	-	RING	-	-
Vaucheria litorea, Strain CCMP2940	-	-	-	RING	-	-
Alveolata sp_, Strain CCMP3155	-	-	-	-	Psc	-
Bigelowiella longifila, Strain CCMP242	-	-	-	-	Psc	Pc
Bolidomonas pacifica, Strain RCC208	-	-	-	-	Psc	-
Cafeteria sp_, Strain Caron Lab Isolate	-	-	-	-	Psc	-
Calcidiscus leptoporus, Strain RCC1130	-	-	-	-	Psc	Pc
Chattonella-subsalsa-CCMP2191	-	-	-	-	Psc	Pc
Chlorarachnion reptans, Strain CCCM449	-	-	-	-	Psc	Pc	Clade 4
Chrysochromulina ericina, Strain CCMP281	-	-	-	-	Psc	Pc
Chrysochromulina rotalis, Strain UIO044	-	-	-	-	Psc	Pc
Chrysochromulina-polylepis-CCMP1757	-	-	-	-	Psc	-
Chrysoculter rhomboideus, Strain RCC1486	-	-	-	-	Psc	Pc	Clade 4
Gymnochlora sp_, Strain CCMP2014	-	-	-	-	Psc	-
Partenskyella glossopodia, Strain RCC365	-	-	-	-	Psc	Pc
Pleurochrysis-carterae-CCMP645	-	-	-	-	Psc	Pc
Proteomonas sulcata, Strain CCMP704	-	-	-	-	Psc	-
Prymnesium-parvum-Texoma1	-	-	-	-	Psc	Pc
Rhizochromulina marina cf, Strain CCMP1243	-	-	-	-	Psc	-
Rhodomonas abbreviata, Strain Caron Lab Isolate	-	-	-	-	Psc	-
Scyphosphaera apsteinii, Strain RCC1455	-	-	-	-	Psc	Pc
Staurosira complex sp_, Strain CCMP2646	-	-	-	-	Psc	-
Stephanopyxis turris, Strain CCMP 815	-	-	-	-	Psc	Pc
Synedropsis recta cf, Strain CCMP1620	-	-	-	-	Psc	-
Vitrella brassicaformis, Strain CCMP3346	-	-	-	-	Psc	Pc
Anophryoides haemophila, Strain AH6	-	-	-	-	-	Pc
Aplanochytrium stocchinoi, Strain GSBS06	-	-	-	-	-	Pc
Astrosyne radiata, Strain 13vi08-1A	-	-	-	-	-	Pc
Chaetoceros-curvisetus	-	-	-	-	-	Pc
Chromera velia, Strain CCMP2878	-	-	-	-	-	Pc
Chrysochromulina polylepis, Strain UIO037	-	-	-	-	-	Pc
Euplotes harpa, Strain FSP1.4	-	-	-	-	-	Pc
Fragilariopsis-kerguelensis-L26_C5	-	-	-	-	-	Pc
Glenodinium-foliaceum-CCAP1116_3	-	-	-	-	-	Pc
Gloeochaete witrockiana, Strain SAG 46.84	-	-	-	-	-	Pc
Hemiselmis andersenii, Strain CCMP644	-	-	-	-	-	Pc
Heterosigma-akashiwo-CCMP2393	-	-	-	-	-	Pc
Lingulodinium-polyedra-CCMP1738	-	-	-	-	-	Pc
Litonotus pictus, Strain P1	-	-	-	-	-	Pc
Pavlova gyrans, Strain CCMP608	-	-	-	-	-	Pc
Perkinsus-chesapeaki-ATCC_PRA_65	-	-	-	-	-	Pc
Phaeocystis antarctica, Strain Caron Lab Isolate	-	-	-	-	-	Pc
Prorocentrum-minimum-CCMP2233	-	-	-	-	-	Pc
Rhodomonas lens, Strain RHODO	-	-	-	-	-	Pc	Clade 4
Skeletonema-dohrnii-SkelB	-	-	-	-	-	Pc	Clade 2
Stereomyxa ramosa, Strain Chinc5	-	-	-	-	-	Pc
Strombidium rassoulzadegani, Strain ras09	-	-	-	-	-	Pc
Stygamoeba regulata, Strain BSH-02190019	-	-	-	-	-	Pc
Timspurckia oligopyrenoides, Strain CCMP3278	-	-	-	-	-	Pc	Clade 4
